# Supplementary material for: Storable Cell-Laden Alginate Based Bioinks for 3D Biofabrication
Source: MDPI journal article supplement (doi:10.3390/bioengineering10010023), 2022-12-23
Supplement: s1 [file s1]

## Supplementary materials

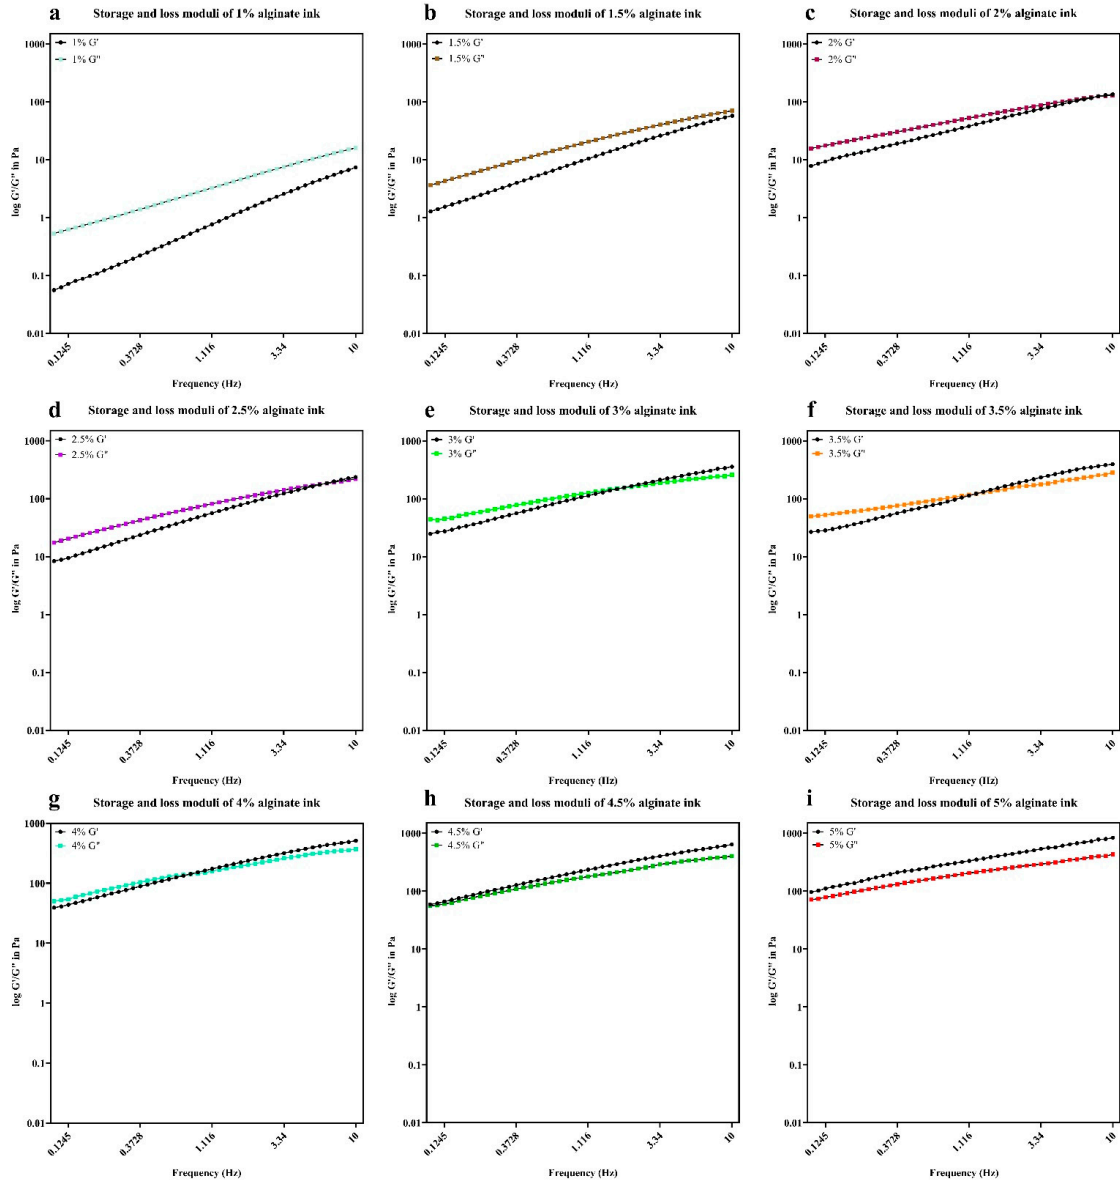

**Figure S1. Storage and loss moduli of all the alginates tested.** On the log y axis the storage and loss moduli of each tested alginate are displayed with shear frequency in Hz displayed on the x axis. Rheological characterization of 1% alginate is displayed in (a), 1.5% in (b), 2% in (c), 2.5% in (d), 3% in (e), 3.5% in (f), 4% in (g), 4.5% in (h) and 5% in (i).
